# Supplementary material for: Moisture-indicating cellulose aerogels for multiple atmospheric water harvesting cycles driven by solar energy
Source: Royal Society of Chemistry journal article supplement (doi:10.1039/d1ta07498a), 2021-01-01
Supplement: d1ta07498a1.pdf [file d1ta07498a1.pdf]

**Moisture-indicated Cellulose Aerogels for Multiple Atmospheric Water  
Harvesting Cycles Driven by Solar Energy**

*Jiaming Sun,<sup>a,b</sup> Bang An,<sup>a,b</sup> Kun Zhang,<sup>a,b</sup> Mingcong Xu,<sup>a,b</sup> Zhenwei Wu,<sup>a,b</sup> Chunhui  
Ma,<sup>a,b</sup> Wei Li,\*<sup>a,b</sup> Shouxin Liu\*<sup>a,b</sup>*

<sup>a</sup> Key Laboratory of Bio-based Material Science and Technology of the Ministry of  
Education

<sup>b</sup> Engineering Research Center of Advanced Wooden Materials of the Ministry of  
Education, Northeast Forestry University, Harbin 150040, China

Corresponding Author: Wei Li (\*Email: liwei19820927@126.com )

Shouxin Liu (\*Email: liushouxin@126.com)

## **S1 Supplemental methods and characterization**

### **S1.1 Preparation of microfibrillated cellulose (MFC)**

Kapok fibers were smashed by a pulverizer. Lignin was then removed by the acidified  $\text{NaClO}_2$  method. Concretely, Kapok fibers were treated with a fixed proportion of  $\text{CH}_3\text{COOH}$  and  $\text{NaClO}_2$  in a water bath at  $75\text{ }^\circ\text{C}$  for 2 h until the kapok fibers turn white. Then hemicellulose was removed with 4 wt%  $\text{NaOH}$  at  $90\text{ }^\circ\text{C}$  for 4 h. Finally, the sample was washed with distilled water to neutrality by filtration to obtain kapok fiber-based cellulose. The obtained kapok fiber-based cellulose was formulated into a 0.8% suspension and then ultrasonicated (JY98- IID, Ningbo Scientz Biotechnology Co., Ltd., China) under 1200 W for 25 min in an ice/water bath to obtain microfibrillated cellulose.

### **S1.2 Preparation of LiCl-decorated poly-pyrrole (Cl-ppy)**

2 ml of pyrrole was dispersed in 20 ml of DI water by sonication. Then 1.645 g of  $(\text{NH}_4)_2\text{S}_2\text{O}_8$  and 3 g of anhydrous  $\text{LiCl}$  were respectively dissolved in 20 ml of distilled water. Under stirring, the  $(\text{NH}_4)_2\text{S}_2\text{O}_8$  aqueous solution and the  $\text{LiCl}$  solution were added dropwise to the pyrrole suspension. The product was washed repeatedly until it is neutral. Finally, the purified Cl-ppy was homogeneously dispersed in DI water by sonication to form Cl-ppy solution.

### **S1.3 Preparation of ethanolamine-decorated $\text{CoCl}_2$ (E- $\text{CoCl}_2$ )**

First, 3.82 g of  $\text{CoCl}_2$  was dissolved in 20 ml of ethanol. Then, 480  $\mu\text{l}$  of ethanolamine was added into it under stirring and stirred for 30 minutes. Finally, E- $\text{CoCl}_2$  was obtained after drying at  $80\text{ }^\circ\text{C}$ .

### **S1.4 Characterization**

Scanning electron microscope (SEM) images were acquired on a Quanta 200 (American FEI Company).-The X-ray photoelectron spectroscopy (XPS) analysis was conducted on a XPS spectrometer (250 Xi, Thermo Fisher Scientific, American). Fourier transform infrared spectroscopy (FTIR) was carried out using an infrared spectrometer (TENSOR 27, Bruker, Germany). The rheological experiments were performed by a rheometer (DHR-2, Waters, America) using the parallel plate on a Peltier plate in a frequency sweep mode. The contact angle was measured using Kruss

Drop Shape Analyzer (Kruss GmbH DSA255). The UV-vis-NIR spectra were obtained on a UV-3600Plus spectrophotometer (Shimadzu, Japan). The adsorption isotherms are obtained from a Vapor Sorption Analyzer (AquaLab) at 25 °C. A CEL-S500/350 xenon lamp (China Education Au-light Co. Ltd., China) was used to simulate sunlight. The light intensity was determined using a CEL-FZ-A light power meter (China Education Au-light Co. Ltd., China). The temperature of surface of specimens was measured by an infrared (IR) thermometer (FLIR A35).

## **S2 XPS analysis**

From CA to SMCA, E-CoCl<sub>2</sub> and Cl-ppy were doped into matrix in succession. The binding energy values for O 1s have negative shifts continuously. It may attribute to the fact that O constantly attracting the electrons of Cl and N of E-CoCl<sub>2</sub> or Cl-ppy, resulting in an increase in its electron cloud density. In the N 1s spectrum in Figure 2b, the peak at 401.4 eV corresponds to -NH<sup>+</sup> (N-Q), whereas the peak at 399.2 eV is assigned to N-H/C-N (N-5).<sup>[1]</sup> After E-CoCl<sub>2</sub> is incorporated into the matrix, N has a positive shift because the electron pair effect of N or O and central cobalt ions increase the binding energy values for N.<sup>[2]</sup> After doping Cl-ppy, the intensity of N weakens while the intensity of N-5 increases. It can be ascribed to N of MCA takes away the electrons from Cl of Cl-ppy and meanwhile Cl-ppy brings in N-C.

**Table S1** The equilibrium water sorption capacity of E-CoCl<sub>2</sub>, MCA, SMCA and CA at 25 °C under different RH conditions.

|                     | RH 25%    | RH 45%    | RH 65%    | RH 85%   |
|---------------------|-----------|-----------|-----------|----------|
| E-CoCl <sub>2</sub> | 0.076 g/g | 0.52 g/g  | 0.94 g/g  | 1.3 g/g  |
| MCA                 | 0.49 g/g  | 0.69 g/g  | 1.12 g/g  | 2.52 g/g |
| SMCA                | 0.49 g/g  | 0.69 g/g  | 1.07 g/g  | 2.38 g/g |
| CA                  | 0.048 g/g | 0.033 g/g | 0.083 g/g | 0.26 g/g |

**Table S2** The consecutive test of SMCA.

| Date          | weather | The max temperature, °C | RH at 12:00, % | The mass of collected water for the cycle 1, g | The mass of collected water for the cycle 2, g | The mass of collected water for the cycle 3, g | The total mass of collected water, g |
|---------------|---------|-------------------------|----------------|------------------------------------------------|------------------------------------------------|------------------------------------------------|--------------------------------------|
| July 22, 2021 | Cloudy  | 32                      | 68             | 9.73                                           | 5.58                                           | 2.48                                           | 17.79                                |
| July 23, 2021 | Cloudy  | 33                      | 65             | 10.04                                          | 5.72                                           | 2.57                                           | 18.33                                |
| July 24, 2021 | Sunny   | 34                      | 51             | 9.67                                           | 5.92                                           | 2.95                                           | 18.54                                |
| July 25, 2021 | Cloudy  | 32                      | 59             | 9.31                                           | 4.78                                           | 2.68                                           | 16.77                                |
| July 26, 2021 | Cloudy  | 33                      | 70             | 11.02                                          | 5.58                                           | 2.52                                           | 19.12                                |

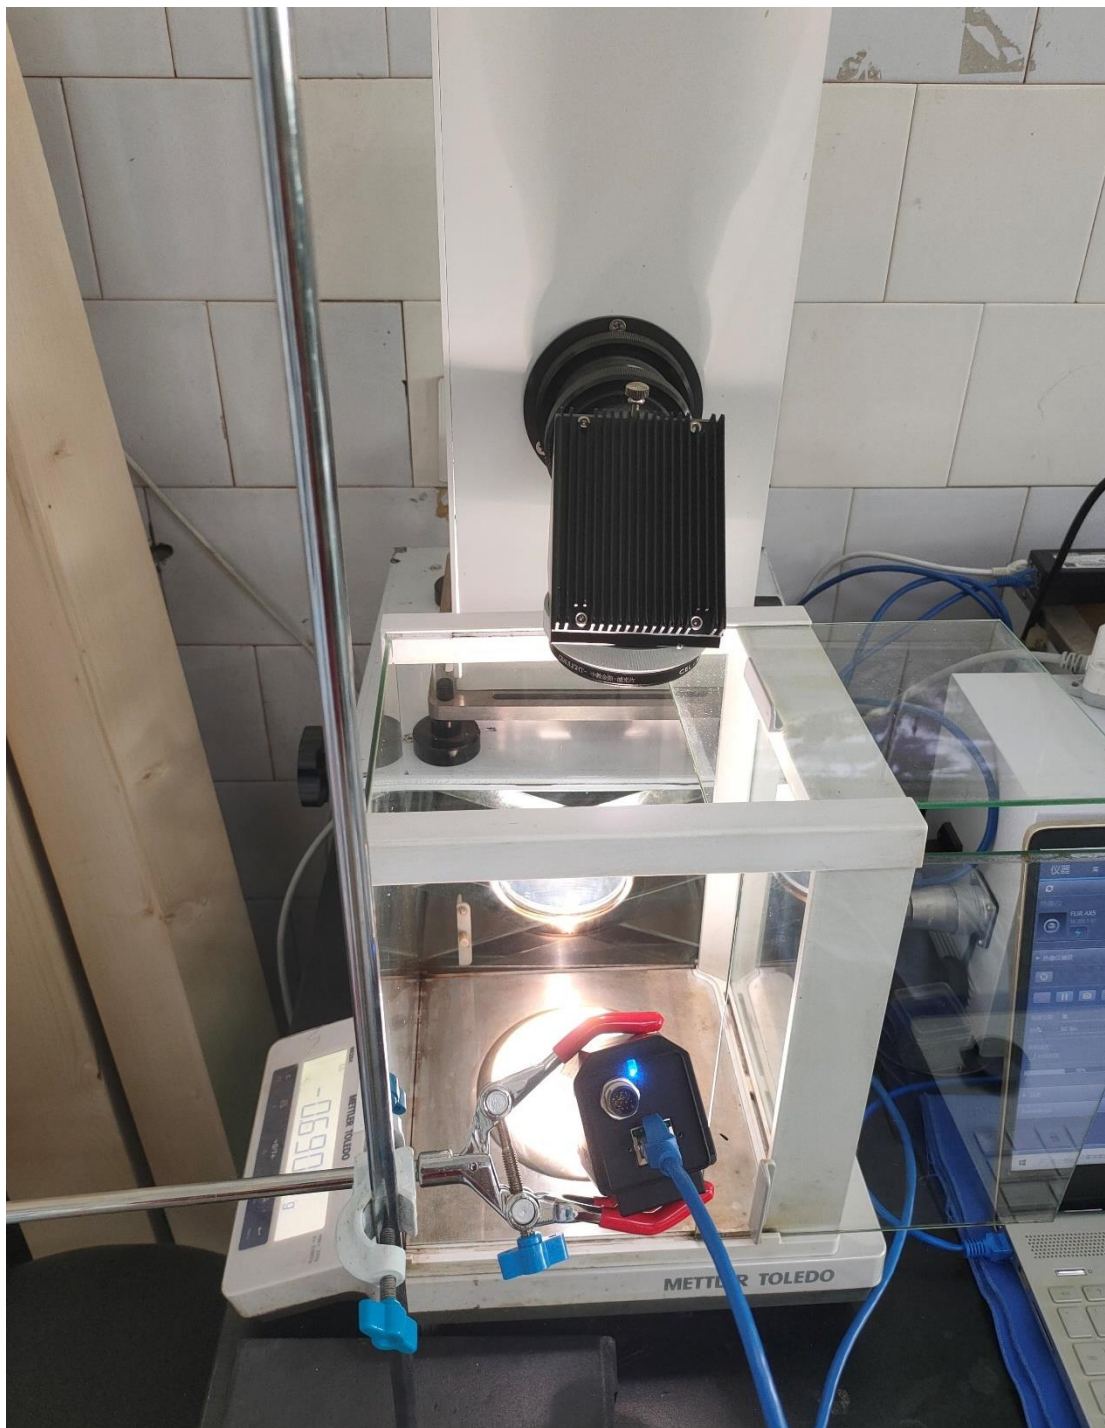

**Figure S1** Digital photo of device of indoor solar-powered vapor evaporation.

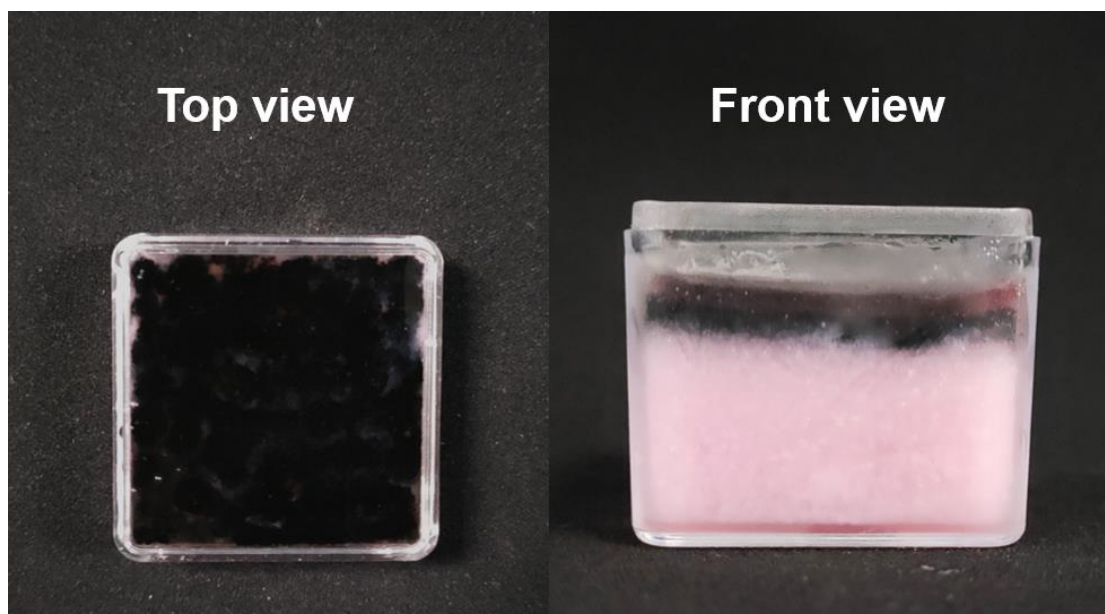

**Figure S2** The mixture of MFC and E-CoCl<sub>2</sub> can support Cl-ppy suspension very well.

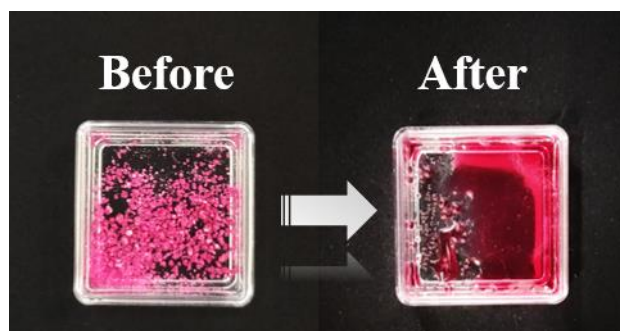

**Figure S3** Photograph of pure  $\text{CoCl}_2 \cdot 6\text{H}_2\text{O}$  changing to liquid after capturing moisture at 65%.

Pure  $\text{CoCl}_2$  becomes liquid after absorbing moisture. The hydrophilicity and porous structure of MCA-x can compound it easily, resulting to a perfect solution to the problem of leakage.

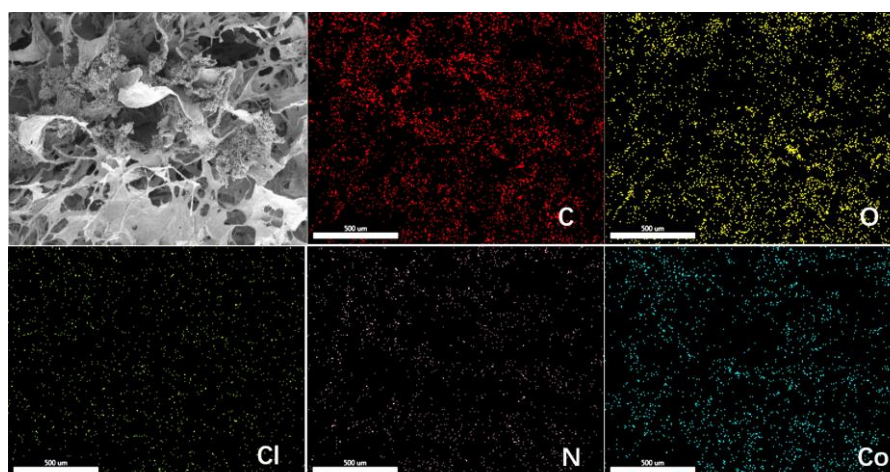

**Figure S4** Mapping of SMCA.

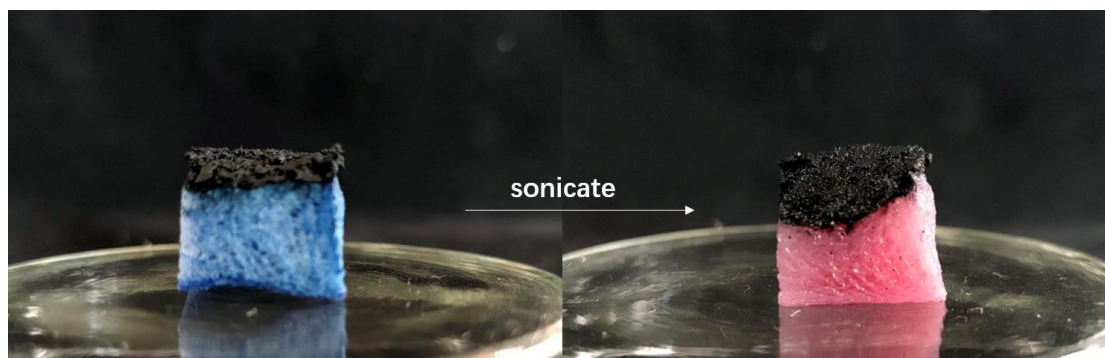

**Figure S5** The bilayer structure maintained well after sonicating in water for 10 mins verifying the strong entanglement between Cl-ppy and cellulose aerogel.

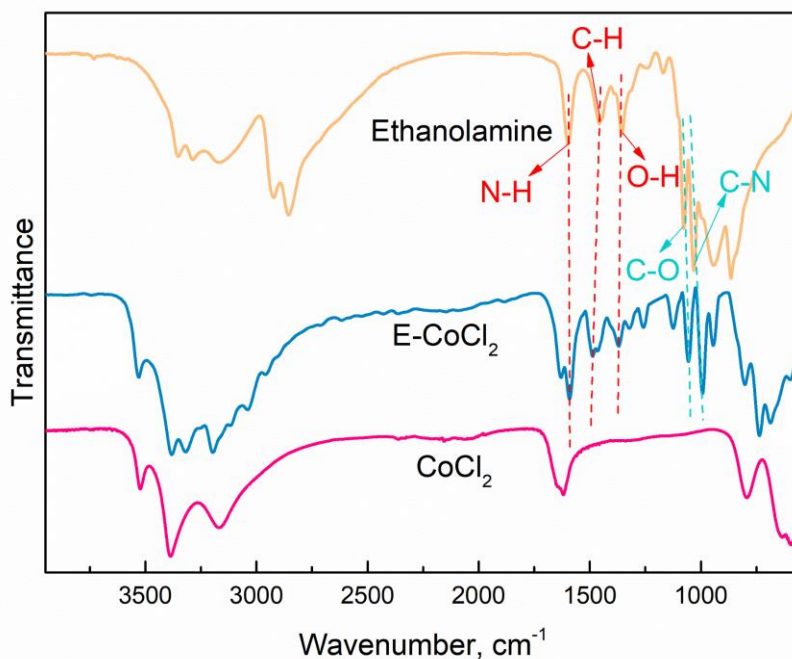

**Figure S6** FTIR spectra of ethanolamine,  $\text{CoCl}_2$  and  $\text{E-CoCl}_2$ .

It is observed that ethanolamine has two sharp bands of  $\nu(\text{C-O})$  at  $1074\text{ cm}^{-1}$  and  $\nu(\text{C-N})$  at  $1028\text{ cm}^{-1}$ , which have blue shifts compared to that of  $\text{N-CoCl}_2$ .<sup>[3]</sup> Besides, the  $\delta(\text{N-H})$  band at  $1598\text{ cm}^{-1}$ ,  $\delta(\text{C-H})$  band at  $1458\text{ cm}^{-1}$  and  $\delta(\text{O-H})$  band at  $1359\text{ cm}^{-1}$  of the free ethanolamine show red shifts (at  $1633\text{ cm}^{-1}$ ,  $1489\text{ cm}^{-1}$ , and  $1371\text{ cm}^{-1}$ , respectively) upon complexation.<sup>[2]</sup> These results confirm the coordination of cobalt with the hydroxy O atom and the amino N atom of the ethanolamine



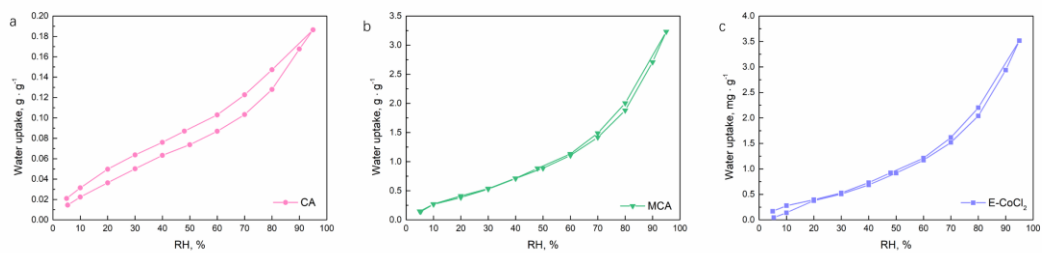

**Figure S7** Water sorption/desorption isotherms of (a) CA, (b) MCA and (c) E-CoCl<sub>2</sub> at 25 °C.

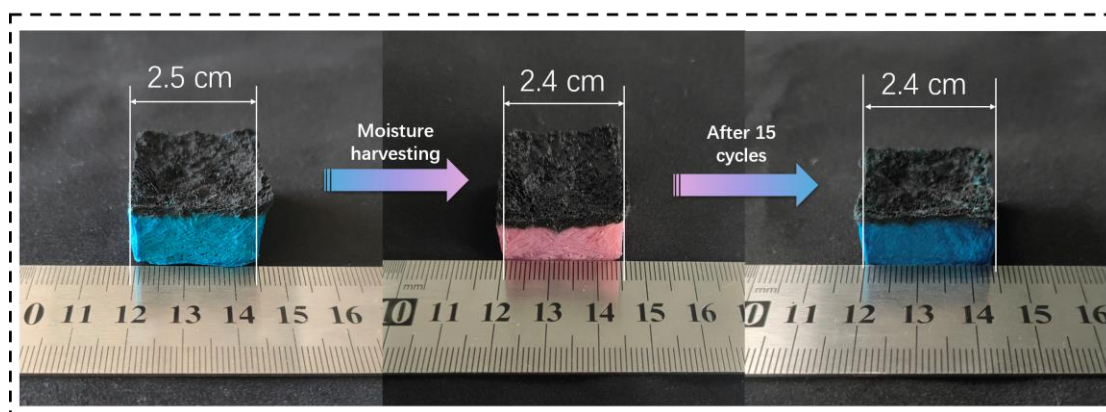

**Figure S8** Digital photos of size change of SMCA.

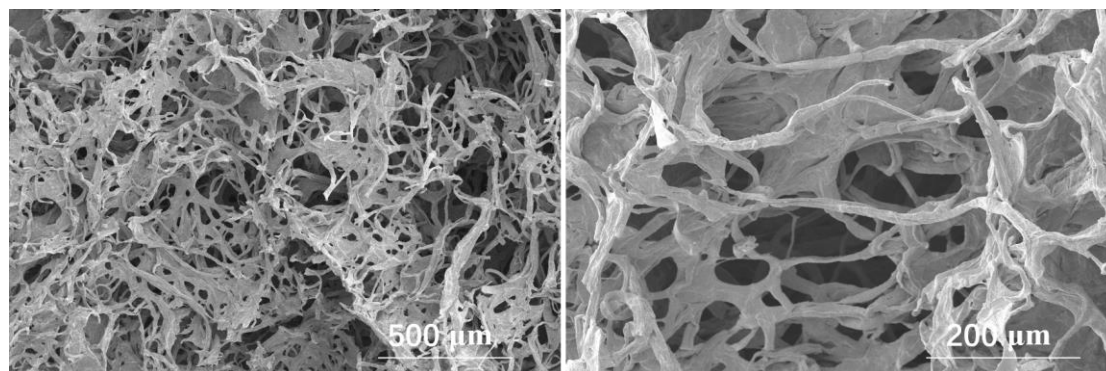

**Figure S9** SEM images of SMCA after 15 sorption/desorption cycles.

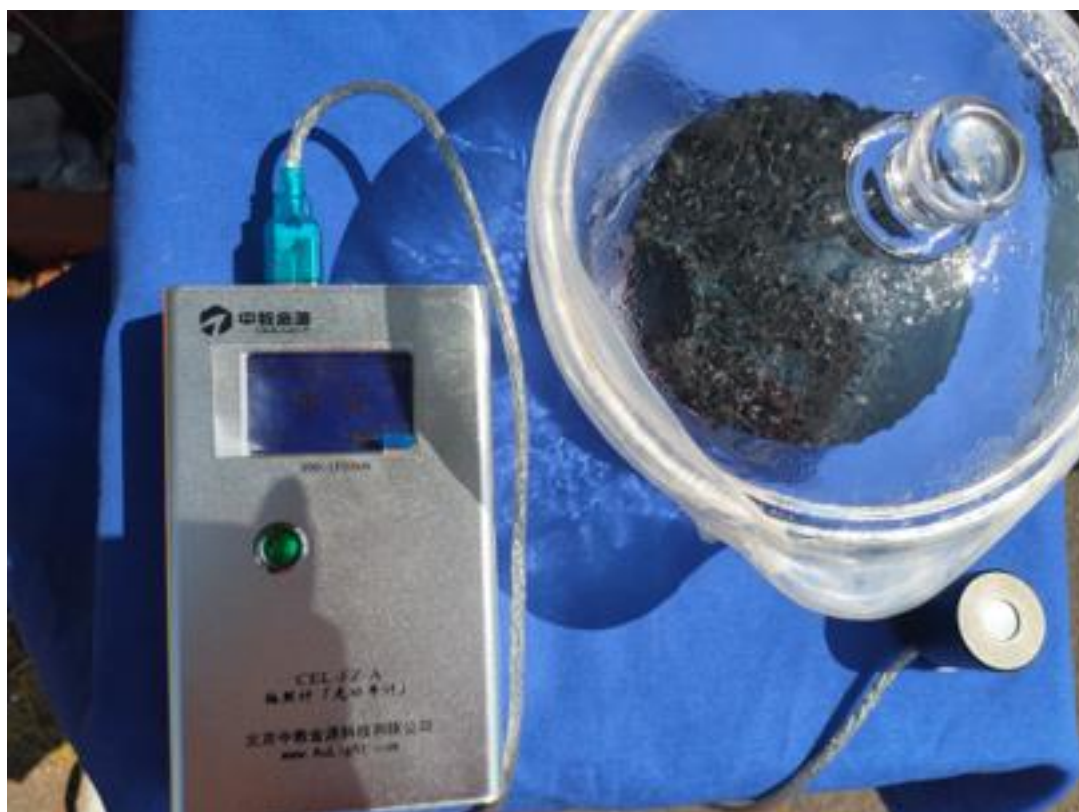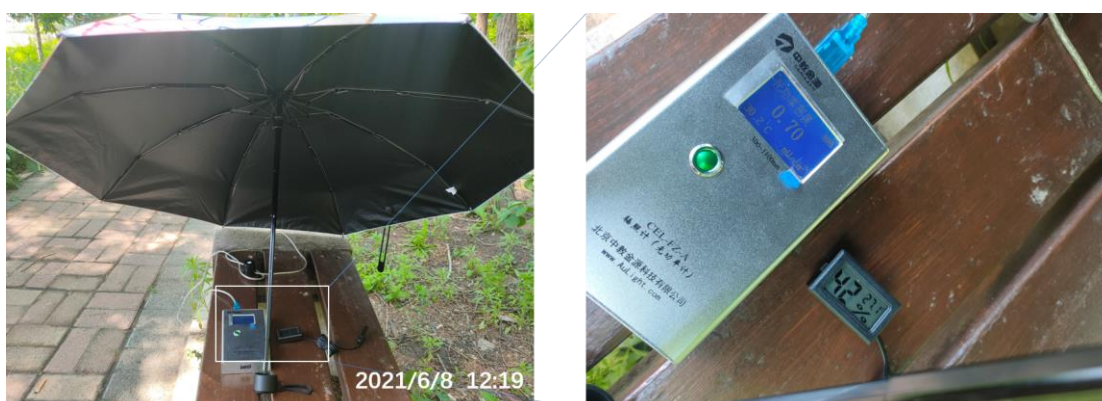

**Figure S10** Digital photos of device of outdoor experiments. (The above photo is the desorption process in the sun, and the bottom photo is the sorption process in the shade)

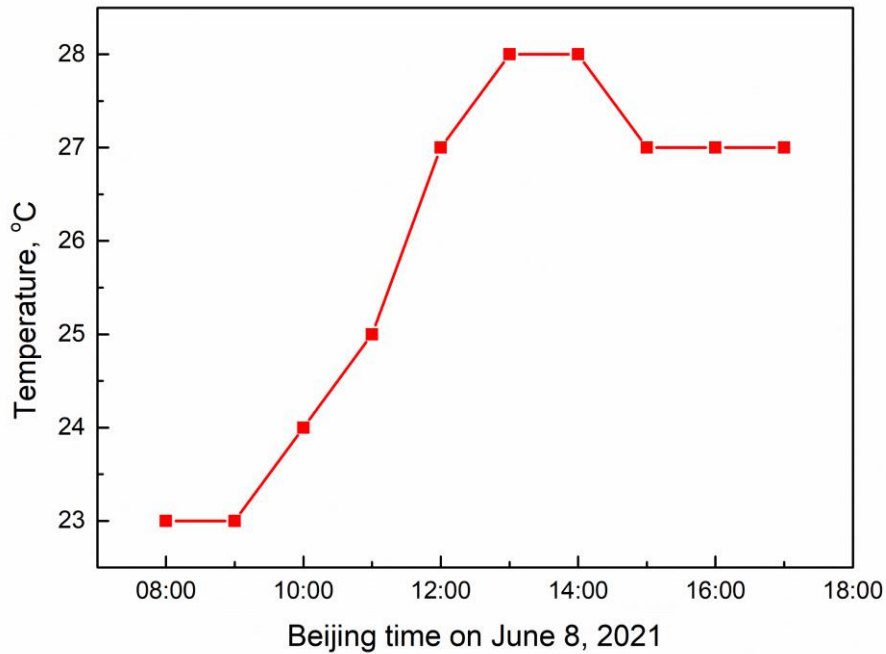

**Figure S11** Detailed temperature variation of outdoor experiment:

**Details of outdoor experiment:**

The first water-harvesting process was from 20:00 June 7, 2021 to 8:00, June 8, 2021. The first sunlight power desorption process was started on June 8, 2021 at 8:00, and around 10.88 g of water was collected within 106 min (8:00-9:46). The Second water-harvesting process was start from 9:46 June 8, 2021 to 11:50 June 8, 2021. The second sunlight power desorption process was started on June 8, 2021 at 11:55, and around 4.87 g of water was collected within 85 min (11:55-13:20). The third water-harvesting process was start from 13:25 June 8, 2021 to 15:25 June 8, 2021. The third sunlight power desorption process was started on June 8, 2021 at 15:25, and around 2.32 g of water was collected within 95 min (15:25-17:00).

## Reference

- [1] a) F. Zhao, X. Zhou, Y. Liu, Y. Shi, Y. Dai, G. Yu, *Adv Mater* **2019**, 31, e1806446; b) P. Pfluger, M. Krounbi, G. B. Street, G. Weiser, *The Journal of Chemical Physics* **1983**, 78, 3212-3218; c) J. Sun, W. Li, E. Lei, Z. Xu, C. Ma, Z. Wu, S. Liu, *Journal of Power Sources* **2019**, 438, 227030.
- [2] X. Zhang, J. Yang, R. Borayek, H. Qu, D. K. Nandakumar, Q. Zhang, J. Ding, S. C. Tan, *Advanced Science* **2021**, 8, 2003939.
- [3] a) N. Jiang, R. Wu, J. Li, Y. F. Sun, J. K. J. J. o. A. Jian, *Compounds*, **2012**, 536, 85.
